# Supplementary material for: The Role of IL-6 in Inner Ear Impairment: Evidence from 146 Recovered Patients with Omicron Infected in Tianjin, China
Source: MDPI journal article supplement (doi:10.3390/jcm12031114), 2023-01-31
Supplement: s1 [file s1]

# Supplementary

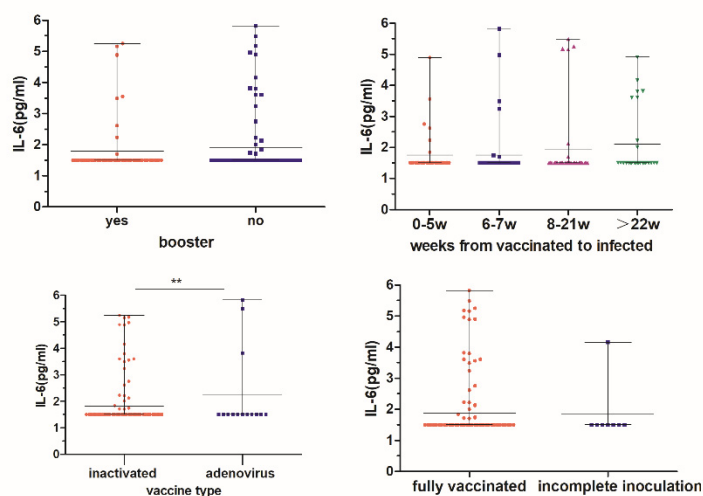

**Figure S1.** Comparison of IL-6 for different characteristic of vaccine .

**Table S1.** DPOAE results and patients' vaccination statuses.

|                                   | N           | fail       | pass        | P     |
|-----------------------------------|-------------|------------|-------------|-------|
| Booster vaccinated                |             |            |             |       |
| Yes                               | 59 (40.4%)  | 13 (22.0%) | 46 (78.0%)  | 0.364 |
| No                                | 87 (59.6%)  | 14 (16.1%) | 73 (83.9%)  |       |
| Fully vaccinated                  |             |            |             |       |
| Yes                               | 138 (94.5%) | 25 (18.1%) | 113 (81.9%) | 0.626 |
| No                                | 8 (5.5%)    | 2 (25.4%)  | 6 (75%)     |       |
| Vaccine type                      |             |            |             |       |
| inactivated                       | 132 (90.4%) | 21 (77.8%) | 111 (94.9%) | 0.004 |
| adenovirus                        | 12 (8.2%)   | 6 (22.2%)  | 6 (5.1%)    |       |
| Weeks from vaccinated to infected |             |            |             |       |
| 0-5                               | 34 (23.6%)  | 9 (33.3%)  | 25 (21.4%)  | 0.194 |
| 6-7                               | 48 (33.3%)  | 6 (22.2%)  | 42 (35.9%)  |       |
| 8-21                              | 35 (24.3%)  | 9 (33.3%)  | 26 (22.2%)  |       |
| > 22                              | 27 (18.8%)  | 3 (11.1%)  | 24 (20.5%)  |       |

The Chi-square test was used to determine the differences in categorical data between the different groups.
